# Supplementary material for: Continuous glucose monitoring during pregnancy in healthy mice
Source: PubMed Central journal article supplement (PMC7904906; doi:10.1038/s41598-021-83901-x), 2021-02-24
Supplement: 41598_2021_83901_MOESM1_ESM.pdf [file 41598_2021_83901_MOESM1_ESM.pdf]

# Continuous glucose monitoring during pregnancy in healthy mice.

Caroline Wuyts<sup>1,2</sup>, Caroline Simoens<sup>1,2,3</sup>, Silvia Pinto<sup>1,2</sup>, Koenraad Philippaert<sup>1,2,5</sup> and

Rudi Vennekens<sup>1,2,5,\*</sup>

<sup>1</sup> Laboratory of Ion Channel Research, TRP Research Platform Leuven, Department of Cellular and Molecular Medicine, KU Leuven, Leuven, Belgium.

<sup>2</sup> VIB Center for Brain & Disease Research, Leuven, Belgium.

<sup>3</sup> Laboratory of Clinical and Experimental Endocrinology, Department of Chronic Diseases, Metabolism and Ageing, KU Leuven, Leuven, Belgium.

<sup>5</sup> Authors share last authorship

\*Corresponding author: Rudi Vennekens, [rudi.vennekens@kuleuven.be](mailto:rudi.vennekens@kuleuven.be)

## Supplementary Information

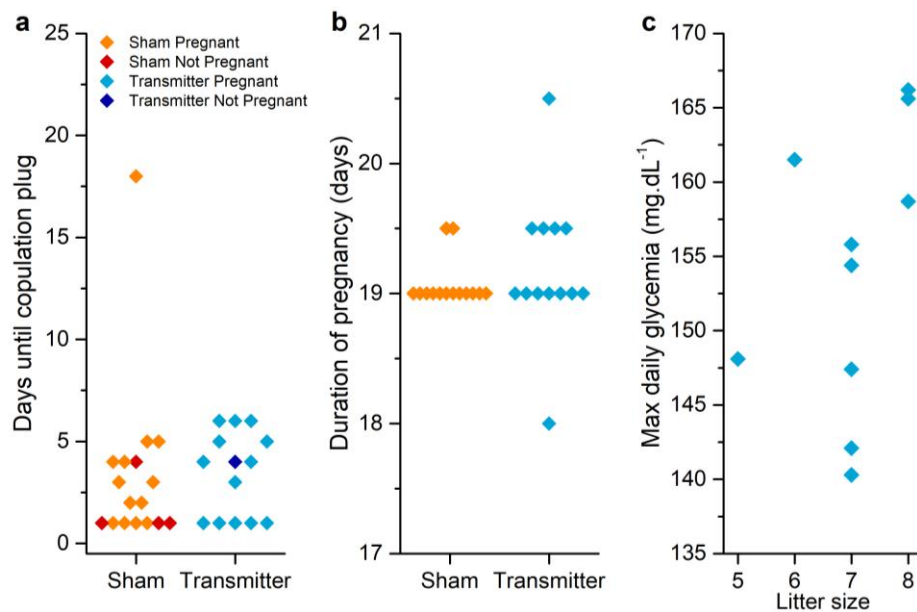

**Figure S1 | Duration until copulation plug, duration of pregnancy and correlation between litter size and maximal daily glycaemia.** (a) Coupled time before copulation plug. Light colours: Plug that resulted in pregnancy. Dark colours: Plug that did not result in pregnancy. (sham group: n = 17 mice, transmitter group: n = 14 mice) (b) Duration of pregnancy (sham group: n = 14 mice, transmitter group: n = 13 mice) (c) Maximal mean 24h glucose level during pregnancy (Fig. 4b) is not correlated with the litter size.

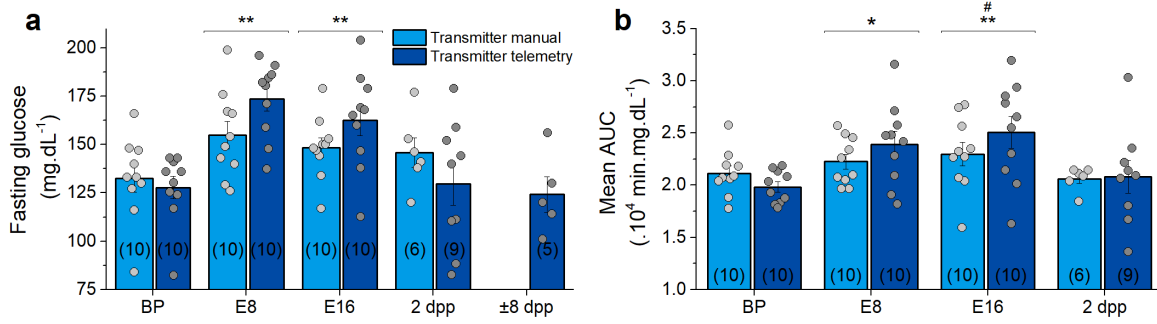

**Figure S2 | Manual and telemetric measured fasting glucose and AUC for the OGTT in the transmitter mice. (a)** Fasting glucose, arithmetic mean  $\pm$  s.e.m., change significantly over the course of pregnancy in the telemetric measured values. **(b)** AUC, arithmetic mean  $\pm$  s.e.m., change significantly over the course of pregnancy (Two-way repeated measures ANOVA, n-numbers are indicated between brackets for every group). \*: difference compared to BP, #: difference compared to 2dpp.

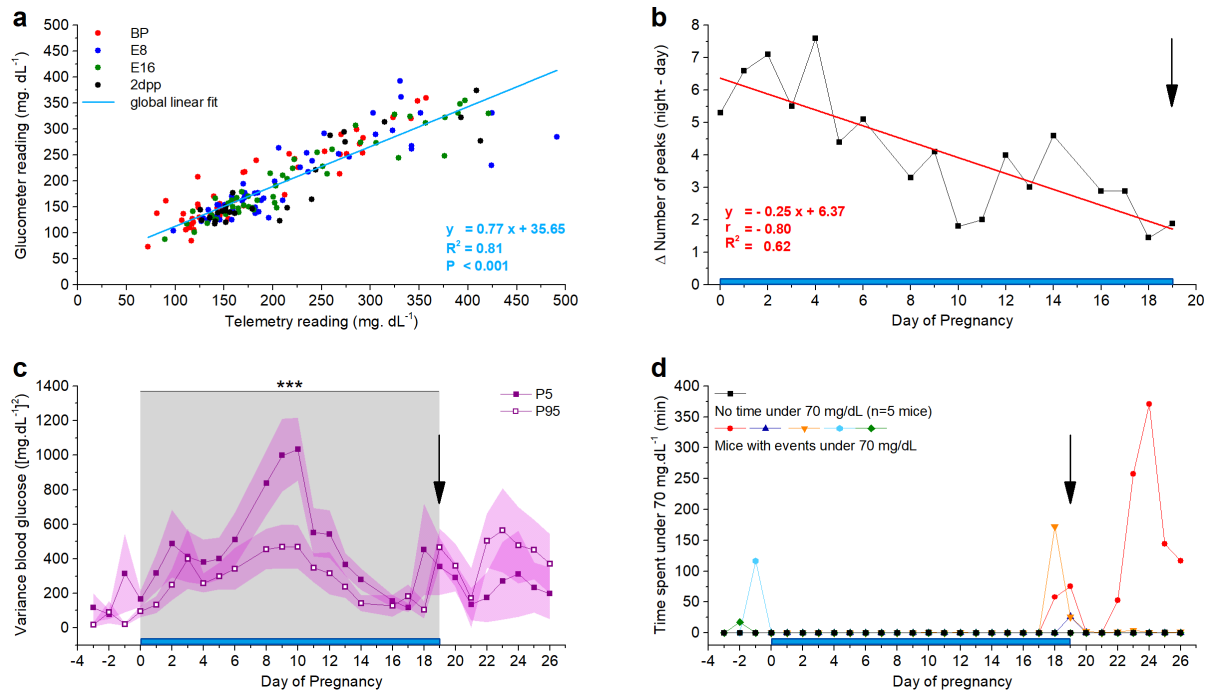

**Figure S3 | Correlation between CGM and glucometer readings, glycaemic variability and hypoglycaemia during pregnancy.** (a) Correlation between the blood glucose levels measured by telemetry and the glucometer. (b) The difference in the number of glucose excursions between day and night decreases during pregnancy (n = 10 mice). (c) The mean variance  $\pm$  s.e.m. in blood glucose in the 5<sup>th</sup> percentile is significantly higher than the mean variance  $\pm$  s.e.m. in blood glucose in the 95<sup>th</sup> percentile over the course of pregnancy (Two-way ANOVA,  $p = 5 \times 10^{-5}$ , n = 10 mice, 19 days). (d) Only half (5 out of 10 mice) of the mice showed hypoglycaemia (blood glucose levels  $< 70 \text{ mg.dL}^{-1}$ ) in the recorded period. They are indicated in different colours. The hypoglycaemic periods were short and occurred mainly before, at the end and after pregnancy. Blue bar: time of pregnancy. Black arrow: delivery.

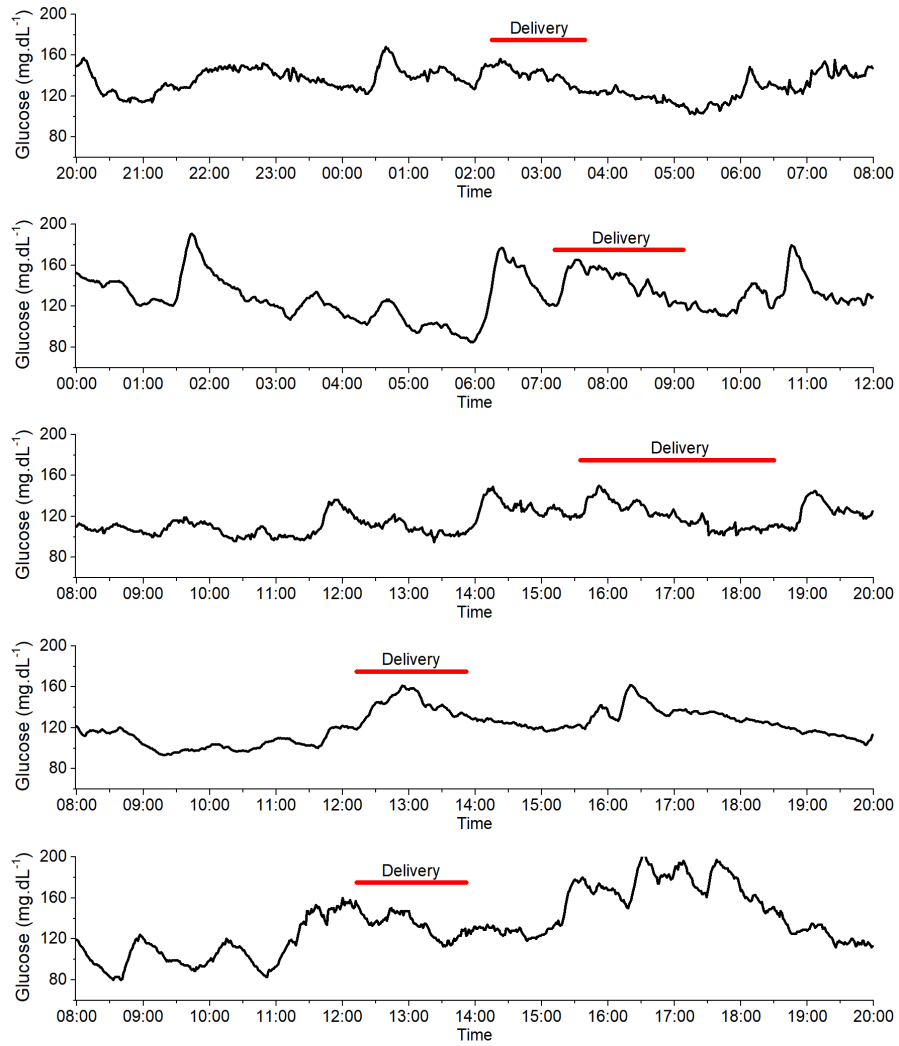

**Figure S4 | Blood glucose profiles of 24 hours around delivery for five individual mice.** The red line indicates time of delivery.

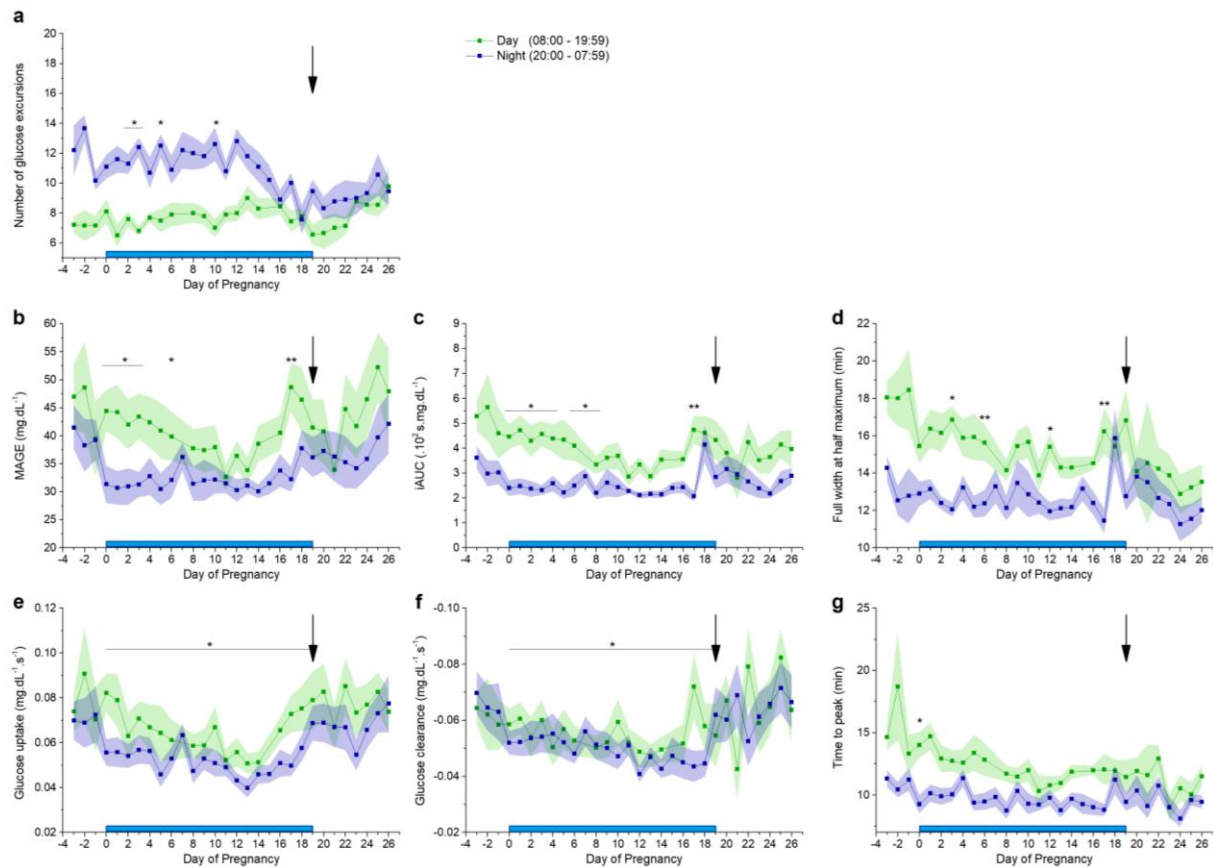

**Figure S5 | Characterization of glucose excursions with the threshold to determine the glucose excursions equal to one standard deviation over the mean daily blood glucose. (a)** Mean number of blood glucose excursions  $\pm$  s.e.m., note the difference between the number of excursions during the day and the night decreases during the pregnancy (paired t-test corrected for multiple comparison). **(b)** Mean amplitude of glucose excursions (MAGE)  $\pm$  s.e.m. (paired t-test corrected for multiple comparison). **(c)** Arithmetic mean incremental area under the curve (iAUC)  $\pm$  s.e.m. of the glucose excursions (paired t-test corrected for multiple comparison). **(d)** Arithmetic mean full width at half maximum  $\pm$  s.e.m. of the glucose excursions (paired t-test corrected for multiple comparison). **(e)** Arithmetic mean of the glucose uptake  $\pm$  s.e.m. of the glucose excursions. The glucose uptake is slower during the pregnancy (paired t-test). **(f)** The arithmetic mean of the clearance rate  $\pm$  s.e.m. of the glucose excursions is slower during the pregnancy (paired t-test). **(g)** Arithmetic mean of time to peak  $\pm$  s.e.m. of the glucose excursions (paired t-test corrected for multiple comparison). Blue bar: pregnancy. Black arrow: delivery. (n = 10 mice).

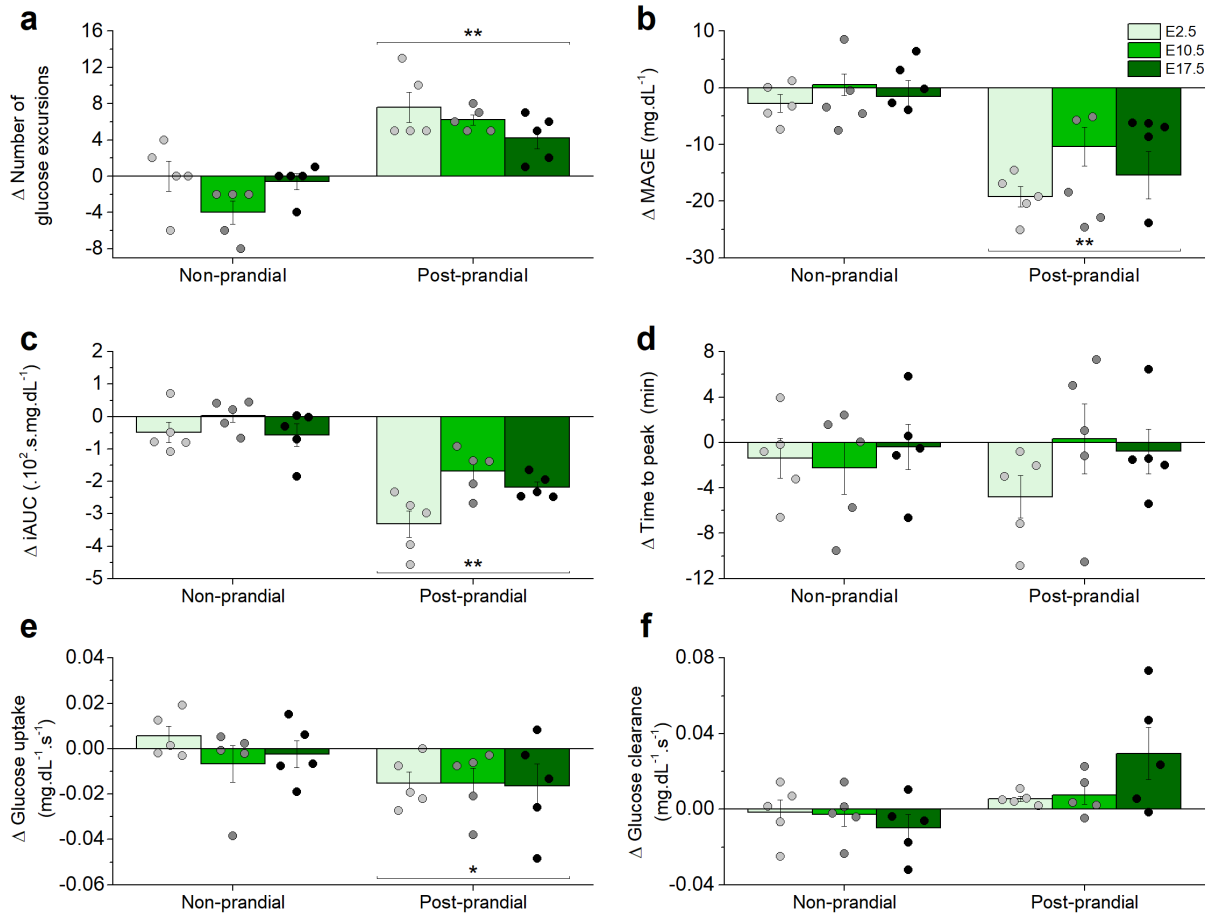

**Figure S6 | Difference between night and day for the characteristics of post-prandial and non-prandial glucose excursions.** (a) Number of blood glucose excursions, arithmetic mean  $\pm$  s.e.m.. There are more post-prandial glucose excursions during the night compared to during the day (Two-way repeated measures ANOVA,  $p = 0.001$ ). (b) Amplitude of glucose excursions (MAGE), arithmetic mean  $\pm$  s.e.m.. MAGE of post-prandial glucose excursions is bigger during daytime compared to nighttime (Two-way repeated measures ANOVA,  $p = 0.002$ ). (c) Incremental area under the curve (iAUC), arithmetic mean  $\pm$  s.e.m., of the glucose excursions. During the day, the iAUC of the post-prandial glucose excursions is bigger than during the night (Two-way repeated measures ANOVA,  $p = 0.001$ ). (d) Time to peak, arithmetic mean  $\pm$  s.e.m., of the glucose excursions. (e) Glucose uptake, arithmetic mean  $\pm$  s.e.m., of the glucose excursions. The glucose uptake of post-prandial glucose excursions is smaller at night compared to the day (Two-way repeated measures ANOVA,  $p = 0.02$ ). (f) Glucose clearance, arithmetic mean  $\pm$  s.e.m., of the glucose excursions. ( $n = 5$  mice)

|                                                                  |               | Day                              |                   |                   | Night                           |                   |                   |                           |
|------------------------------------------------------------------|---------------|----------------------------------|-------------------|-------------------|---------------------------------|-------------------|-------------------|---------------------------|
|                                                                  |               | E2.5                             | E10.5             | E17.5             | E3                              | E11               | E18               | p value,<br>day vs. night |
| <b>Number of glucose excursions</b>                              | Non-prandial  | 7.2<br>± 2.1                     | 9.0<br>± 0.71     | 7.6<br>± 2.3      | 7.2<br>± 3.0                    | 5.0<br>± 2.6      | 7.0<br>± 1.7      | 0.13, ns                  |
|                                                                  | Post-prandial | 4.8<br>± 1.5                     | 5.8<br>± 1.9      | 1.1<br>± 0.51     | 12.4<br>± 2.6                   | 12.0<br>± 2.4     | 9.6<br>± 1.5      | <b>0.0011 **</b>          |
| p value,<br>Non- vs Post-prandial                                |               | <b>0.022 *</b>                   |                   |                   | <b>0.014 *</b>                  |                   |                   |                           |
| <b>MAGE</b><br>mg.dL <sup>-1</sup>                               | Non-prandial  | 18.54<br>± 3.13                  | 16.71<br>± 3.31   | 19.8<br>± 3.73    | 15.78<br>± 6.06                 | 17.24<br>± 6.98   | 18.29<br>± 7.15   | 0.45, ns                  |
|                                                                  | Post-prandial | 47.98<br>± 11.15                 | 37.89<br>± 10.08  | 52.62<br>± 11.09  | 28.75<br>± 10.42                | 27.52<br>± 6.87   | 37.24<br>± 8.14   | <b>0.0020 **</b>          |
| p value,<br>Non- vs Post-prandial                                |               | <b>0.0021 **</b>                 |                   |                   | <b>1.15x10<sup>-4</sup> ***</b> |                   |                   |                           |
| <b>iAUC</b><br>.10 <sup>2</sup> .s. mg.dL <sup>-1</sup>          | Non-prandial  | 1.78<br>± 0.27                   | 1.71<br>± 0.26    | 2.30<br>± 0.93    | 1.29<br>± 0.71                  | 1.75<br>± 0.55    | 1.73<br>± 0.59    | 0.20, ns                  |
|                                                                  | Post-prandial | 6.71<br>± 0.76                   | 4.94<br>± 1.09    | 6.96<br>± 0.83    | 3.39<br>± 1.48                  | 3.25<br>± 0.56    | 4.79<br>± 0.78    | <b>0.0010 **</b>          |
| p value,<br>Non- vs Post-prandial                                |               | <b>6.99x 10<sup>-5</sup> ***</b> |                   |                   | <b>0.0013 **</b>                |                   |                   |                           |
| <b>Time to peak</b><br>minutes                                   | Non-prandial  | 11.35<br>± 1.81                  | 13.29<br>± 3.23   | 11.31<br>± 3.49   | 9.97<br>± 2.94                  | 11.03<br>± 3.49   | 10.91<br>± 3.79   | 0.32, ns                  |
|                                                                  | Post-prandial | 20.4<br>± 4.75                   | 19.32<br>± 8.17   | 20.29<br>± 2.29   | 15.62<br>± 1.30                 | 19.63<br>± 5.31   | 19.50<br>± 5.95   | 0.31, ns                  |
| p value,<br>Non- vs Post-prandial                                |               | <b>0.012 *</b>                   |                   |                   | <b>0.014 *</b>                  |                   |                   |                           |
| <b>Glucose uptake</b><br>mg.dL <sup>-1</sup> .s <sup>-1</sup>    | Non-prandial  | 0.032<br>± 0.010                 | 0.035<br>± 0.014  | 0.039<br>± 0.016  | 0.038<br>± 0.017                | 0.028<br>± 0.008  | 0.036<br>± 0.016  | 0.80, ns                  |
|                                                                  | Post-prandial | 0.073<br>± 0.022                 | 0.073<br>± 0.021  | 0.085<br>± 0.019  | 0.058<br>± 0.018                | 0.058<br>± 0.012  | 0.068<br>± 0.013  | <b>0.024 *</b>            |
| p value,<br>Non- vs Post-prandial                                |               | <b>0.0038 **</b>                 |                   |                   | <b>9.04x10<sup>-4</sup> ***</b> |                   |                   |                           |
| <b>Glucose clearance</b><br>mg.dL <sup>-1</sup> .s <sup>-1</sup> | Non-prandial  | -0.035<br>± 0.010                | -0.033<br>± 0.011 | -0.036<br>± 0.015 | -0.037<br>± 0.019               | -0.036<br>± 0.014 | -0.046<br>± 0.014 | 0.33, ns                  |
|                                                                  | Post-prandial | -0.065<br>± 0.016                | -0.063<br>± 0.015 | -0.092<br>± 0.034 | -0.060<br>± 0.018               | -0.055<br>± 0.014 | -0.062<br>± 0.008 | <b>0.042 *</b>            |
| p value,<br>Non- vs Post-prandial                                |               | <b>0.013 *</b>                   |                   |                   | <b>1.9x10<sup>-4</sup> ***</b>  |                   |                   |                           |

**Table S1 | Characterization of post-prandial and non-prandial glucose excursions.** Data presented as mean ± SD. Two-way ANOVA Repeated measures \*: P < 0.05; \*\*:P<0.01; \*\*\*:P< 0.001. The data presented in this table is also shown in Figure 7.
